# Supplementary material
Source: Research Square preprint supplement (doi:10.21203/rs.3.rs-8976120/v1)
Supplement: Supplementary file 1 [file d983748248ce6d0a8543184e.xlsx]

## Sheet: Table S1
Table S1: Identification of non-volatile organic compound in rice-flavored Baijiu aged for different years
name	mz	rt	exact_mass	formula	super_class	CAS	Peak Intensity					VIP
							Y0	Y3	Y6	Y9	Y15
Glycylleucine	187.042	44.3	188.116	C8H16N2O3	Amino acids and derivatives	688-14-2	1024443727.89±472157337.3	634894213.59±33039176.43	573183070.49±19527829.55	1701587412.89±273379401.93	839638744.58±76316760.81	6.18724
L-Ornithine	131.072	67.4	132.09	C5H12N2O2	Amino acids and derivatives	3184-13-2	269869703.74±14970501.3	168297015.71±22788247.51	60341023.89±5215473.29	386637641.59±71166584.67	117263837.5±30317746.41	3.24634
2,4-Diaminobutyric acid	101.071	445.3	118.074	C4H10N2O2	Amino acids and derivatives	1758-80-1	55256298.22±28699853.61	17829711.58±727013.65	120925738.74±3352308.59	50499241.72±3426971.92	25722840.36±2211403.67	2.08838
L-Proline	116.07	50.1	115.063	C5H9NO2	Amino acids and derivatives	147-85-3	65327911.64±9125930.65	184579.52±7696.34	76147076.85±5937359.56	55670784.63±5446399.37	336385.38±79065.36	2.0702
L-Isoleucine	132.103	68.9	131.095	C6H13NO2	Amino acids and derivatives	73-32-5	60097383.46±7427663.46	93906206.53±31991458.01	119382584.43±7999659.95	114553209.36±4030621.39	96342739.48±4069912	1.36301
L-Isoleucine	132.103	68.9	131.095	C6H13NO2	Amino acids and derivatives	73-32-5	17158763.27±2340908.36	39633730.78±1374085.92	6652061.1±429466.56	4137024.7±568200.22	3217985.67±155558.7	1.32865
N-Methyl-4-dimethylallyltryptophan	243.183	54.3	286.168	C17H22N2O2	Amino acids and derivatives	75917-16-7	4778285.84±710976.44	35069029.29±4963449.22	51199141.78±8323909.41	48363847.63±6088879.48	38880547.07±5294597.66	1.27668
N-methyl-L-glutamic Acid	162.076	54.7	161.069	C6H11NO4	Amino acids and derivatives	6753-62-4	12264364.74±1117691.77	4000695.39±443101.01	45292661.18±7335242.71	24164597.41±5479653.54	22604538.67±4052311.78	1.23816
L-Histidinol	124.086	376.3	141.09	C6H11N3O	Amino acids and derivatives	4836-52-6	59234085.96±17524234.71	28565546.91±5678775.69	10298977.81±745525.54	21393218.47±1347720.27	22530891.96±597252.99	1.21791
γ-Aminobutyric acid	126.054	133.4	103.063	C4H9NO2	Amino acids and derivatives	56-12-2	29830396.83±809675.53	13072587.3±2895367.1	8828186.36±971839.05	2295750.21±256588.66	31236063.52±2779207.01	1.17184
Trans-4-hydroxyproline	130.087	448	131.058	C5H9NO3	Amino acids and derivatives	51-35-4	2895168.56±561338.98	10833420.01±1085718.28	1601090.11±260082.69	31468805.92±677001.24	3522074.3±1494325.77	1.03635
L-Arginine	175.119	44.4	174.112	C6H14N4O2	Amino acids and derivatives	74-79-3	5909973.61±1757364.09	2617455.4±1074027.02	29572428.5±3513263.63	4358815.54±629697.27	9835616.39±1448891.71	1.03042
2,3-Dimethoxy-5-methylhydroquinone	184.983	347.3	184.074	C9H12O4	Benzenoids	3066-90-8	130475802.96±13737773.67	200622015.35±24464646.22	9590260.01±1083336.65	400575459.78±33747315.69	235291501.25±77914477.38	3.48913
cis-1,2-Dihydro-3-ethylcatechol	158.08	168.9	140.084	C8H12O2	Benzenoids	66008-19-3	21973312.36±2684071.24	5491412.34±202988.79	112227498.35±25554644.33	60657562.55±8874026.54	56544077.37±1576904.28	1.98283
1,2-Dihydro-1,1,6-trimethylnaphthalene	172.959	152.6	172.125	C13H16	Benzenoids	30364-38-6	12034163.21±1216599.42	63693185.48±5638070.35	25552416.78±2448756.23	21418913.05±5970579.95	6874253.1±3063838.37	1.76544
3-Hexaprenylcatechol	536.157	447.9	518.412	C36H54O2	Benzenoids		27716510.86±3850053.32	6878852.18±424475.96	43481131.01±2120947.35	102668954.87±33003503.82	57898304.82±10557464.1	1.727
Purpurin	255.227	448.9	256.037	C14H8O5	Benzenoids	81-54-9	49869013.01±6520604.64	6144113.18±1511421.35	14366354.64±1457686.12	5538661.8±1690870.78	3366217.61±382873.6	1.40179
3-Hexaprenyl-4,5-Dihydroxybenzoic acid	621.409	390	562.402	C37H54O4	Benzenoids	63975-40-6	13936547.67±3177657.85	5112974.07±2187229.75	3847601.42±534417.51	3559990.88±592071.97	48788767.54±10193218.82	1.37611
3,4-Dihydroxymandelic acid	165.02	101.8	184.037	C8H8O5	Benzenoids	14883-87-5	23099462.4±259137.62	27116720.24±2875232.09	61131969.58±3371652.14	22911811.27±3719054.17	23950585.36±7040610.49	1.26009
4-Hydroxyphenylglyoxylic acid	149.022	384.7	166.027	C8H6O4	Benzenoids	15573-67-8	12979684.9±2495245.94	8247189.18±314401.64	43645795±6278560.84	20091199.31±1793010.15	10417761.65±751200.26	1.21204
(3-Phenoxyphenyl)methanol	201.091	274.1	200.084	C13H12O2	Benzenoids	13826-35-2	933675.84±152868.26	18650281.03±731149.5	7857030.16±2408133.61	2095674.28±586380.69	1438304.3±122219.43	1.01671
Aminohydroquinone	126.056	82.9	125.048	C6H7NO2	Benzenoids	20734-68-3	22720538.22±1331815.31	4031394.18±522345.74	16887354.81±1075334.84	23796300.64±3456211.77	8942029.14±419012.46	1.01301
2-Phenylethyl acetate	203.184	54.3	164.084	C10H12O2	Benzenoids	103-45-7	84618753.22±6327015.61	59459001.23±3413217.55	79370051.63±17004192.1	78135703.24±8142537.32	58784778.82±15755251.03	1.0073
Dicyclohexylamine	182.19	255.3	181.183	C12H23N	Others	101-83-7	389578356.67±31474713.38	464812896.03±27050620.52	144818049.64±9177871	153534277.77±36147818.55	1571244243.28±66276898.36	7.46424
octanoate	166.096	417.4	143.107	C8H15O2-	Others	74-81-7	42265364.11±5909908.53	156171470.92±36110193.75	160620359.37±15473384.6	39435367.72±10164612.89	78674806.76±27476691.65	2.58132
ST 28_2;O4	491.337	400.9	446.34	C28H46O4	Others	124853-28-7	4791588.3±704076.29	2279802.8±170774.45	109459214.96±4462314.64	8207599.34±592224.67	3087829.21±662491.84	2.1687
1-Pentadecene	228.197	351.5	210.235	C15H30	Others	13360-61-7	60340171.6±15524899.69	97460740.86±30282755.34	105879286.95±6846203.97	35731710.03±12458952.68	20327486.58±2115942.81	1.85934
Chikusetsusaponin Ia	738.467	396.1	754.487	C41H70O12	Others	59252-86-7	33708882.9±5983955.38	6031685.9±1851765.13	11605191.19±4327313.76	1523863.12±147934.67	17963484.2±2165732.57	1.18155
Kanzonol K	437.196	356.3	436.189	C26H28O6	Others	156281-30-0	2166066.14±121267.52	26890268.05±7829902.62	3253228.74±334424.05	26977174.02±12121506.37	8712647.32±2830868.28	1.17361
Durohydroquinone	165.041	405.2	166.099	C10H14O2	Others	527-18-4	61016098.2±4855823.66	53329667.28±8476383.49	54555330.05±8263790.1	96027678.68±20128828.25	71260722.58±3357136.74	1.15469
panaxynol	245.267	322.2	244.183	C17H24O	Others	81203-57-8	100494647.52±16388531.42	80732791.36±11282660.52	72515962.07±12199395.64	56578781.75±15353434.05	50763238.92±756674.96	1.14679
3-Decaprenyl-4,5-dihydroxybenzoate	833.499	417	834.653	C57H86O4	Others		20864001.91±4233956.12	37764669.98±4752901.82	18123027.09±1776612.88	5245983.32±860356.93	20499573.84±4211682.18	1.10541
Dihydromacarpine	432.225	356.3	393.121	C22H19NO6	Others	77785-12-7	41721129.6±7416177.79	21926356.49±793173.18	5318782.57±513266.2	12000271.73±637003.33	5391157.28±1589133.29	1.07693
Phytanate	330.335	357.1	312.303	C20H40O2	Others	14721-66-5	22776309.04±1793698.05	19886081.27±889169.5	34096644.74±1999060.46	6366816.72±1329214.8	5089549.39±466436.55	1.04675
(+)-Sesamin monocatechol	360.149	49.2	342.11	C19H18O6	Others	170713-44-7	24529036.02±4365261.21	2176706.41±75338.55	12825527.86±596614.75	3681590.51±296303.45	4974442.39±245701.77	1.02158
Ethyl tetradecanoate	255.066	366.3	256.24	C16H32O2	Others	124-06-1	21104418.17±1549094.08	6666651.69±1753268.72	27677931.97±3162988.92	5048365.66±664601.51	11707195.2±1616901.56	1.01682
Rutin	628.195	441	610.153	C27H30O16	Others	153-18-4	2181747.65±885574.23	9524453.97±747446.34	30225146.36±2589194.26	30147435.81±3103386.4	21855226.04±708480.1	1.00527
Cyclohexan	102.127	432.1	84.0939	C6H12	Other organic acids	110-82-7	539337165.49±70689659.9	503754472.63±47900530.56	202053163.02±44186894	1913060626.84±203393241.88	189730675.97±85153272.44	7.68669
Triacetic acid	127.037	167.1	144.042	C6H8O4	Other organic acids	2140-49-0	47214357.56±16029161.28	14582862.01±4168086.67	25140706.06±4501684.03	45720106.47±3106652.05	99082188.56±32610587.57	1.81717
2-Maleylacetate	141.96	163	158.022	C6H6O5	Other organic acids	24740-88-3	29556049.09±2724636.35	38788061.61±6269452.09	53926324.82±3036786.79	63911651.39±2723502.03	115700416.09±5032201.66	1.63466
Lactic acid					Other organic acids		91118947±17550385.56	78392578±16829646.21	72440628.67±13778813.86	33586423.33±4048894.99	19189232±3258607.21	1.50677
4-Hydroxycyclohexylcarboxylic acid	145.051	235.6	144.079	C7H12O3	Other organic acids	3685-22-1	7683650.59±324405.3	42149933.11±11134230.4	8138451.7±944082.65	31798795.57±4582431.8	4652567.58±1118782.67	1.47945
3-Hydroxy-2-methylglutaric acid	145.047	320.6	162.053	C6H10O5	Other organic acids	1189155-79-0	16257932.83±3821459.12	39726959.94±3116054.19	12522235.97±1705942.36	27109899.44±383333.76	19957830.83±10668856.84	1.15825
Succinic acid	117.056	52.6	118.027	C4H6O4	Other organic acids	110-15-6	28259387.8±8140502.47	17761482.12±3104958.72	7482279.12±1300301.14	47635047.68±3441530.11	19275959.99±751761.92	1.10407
5-Hydroxymethyl-2-furancarboxaldehyde	127.039	251	126.032	C6H6O3	Aldehydes	67-47-0	74135048.73±6543619.69	7737467.17±1242384.15	1834362.84±190399.22	2352036.52±248200.34	55392981.83±3506461.57	1.99628
(Z)-8-Tetradecenal	228.196	326.3	210.198	C14H26O	Aldehydes	169054-69-7	575799739.59±11515612.88	506848151.18±69037286.26	470080722.99±31691463.99	459529921.25±222059710.88	367094066.54±41078661.46	1.92932
Methylimidazole acetaldehyde	125.071	419.3	124.064	C6H8N2O	Aldehydes	19639-03-3	15558628.69±2789510.22	28315901.64±1623883.23	72274572.36±7162499.48	1251229.98±182095.48	71708949.6±9793353.8	1.61606
Coniferaldehyde	201.088	128.9	178.063	C10H10O3	Aldehydes	458-36-6	16876812.06±5533738.35	23034338.92±3805969.35	20497344.48±4746585.61	59178079.53±6420796.64	46041630.6±4627205.63	1.16486
Citrusal	278.185	226.7	260.105	C15H16O4	Aldehydes	5980-07-4	41860525.63±9568415.36	39245112.78±5705903.68	11718654.57±386069.79	10417322.46±1070086.74	7868325.07±339971.41	1.11784
N4-Acetylaminobutanal	130.084	241	129.079	C6H11NO2	Aldehydes	24431-54-7	37626945.14±8964370.51	14707368.56±1415046.26	12663540.14±2416948.41	5152564.97±944839.07	4033369.78±301531.98	1.06287
L-Fucono-1,5-lactone	145.047	196.8	162.053	C6H10O5	Carbohydrates and carbohydrate conjugates		6520341.84±656110.44	3827792.45±461623.56	124562632.59±8655581.76	52549804.15±3573696.36	97217418.97±27434768.45	2.13399
Peonidin 3-rhamnoside 5-glucoside	610.195	447.1	609.182	C28H33O15+	Carbohydrates and carbohydrate conjugates	53859-11-3	95625056.11±17204671.95	81935217.22±6402710.67	160400610.61±25798751.99	39397670.16±14891213.73	100638467.61±25326729.46	1.92924
2-Dehydro-3-deoxy-D-fuconate	145.051	127.3	162.053	C6H10O5	Carbohydrates and carbohydrate conjugates		57596814.15±4203547.22	29265539.26±1304495.48	91236573.45±14128638.59	134312915.64±7432359.54	88037128.5±27506932.57	1.86837
D-1,5-Anhydrofructose	145.047	104.8	162.053	C6H10O5	Carbohydrates and carbohydrate conjugates	75414-43-6	32349467.27±3272839.09	24837559.14±413692.81	95699801.68±16361243.67	61955491.46±10695558.19	43334473.34±4204070.32	1.66019
nuatigenin 3-beta-D-glucopyranoside	591.348	411.1	592.361	C33H52O9	Carbohydrates and carbohydrate conjugates		12568044.46±909937.83	61948819.36±12757227.04	34199199.76±6417544.7	46253192.56±7599693.67	68993970.7±9523958.28	1.53831
L-Sorbose	198.128	250.7	180.063	C6H12O6	Carbohydrates and carbohydrate conjugates	470-15-5	15319572.06±1981268.62	7545243.65±778330.92	42473679.43±3137475.93	7311878.87±203510.4	68146032.6±4714186.44	1.52556
L-Lyxonic acid	149.022	237.5	166.048	C5H10O6	Carbohydrates and carbohydrate conjugates	4172-43-4	84762309.56±9267579.41	81676506.1±9343472.58	32590476.32±2812122.02	67748643.13±4404169.04	27160735.77±2303801	1.46518
2-dehydro-3-deoxy-L-rhamnonate	145.047	217.5	162.053	C6H10O5	Carbohydrates and carbohydrate conjugates		36025422.53±2742850.81	28412531.61±1990332.17	65656145.33±9317432.19	4405169.59±166916.35	46406992.4±2951960.01	1.39599
Galactose	179.058	46.8	180.063	C6H12O6	Carbohydrates and carbohydrate conjugates	59-23-4	37282854.54±7177399.85	11782956.01±2887676.43	52403490.33±11180790.41	43476031.57±11831918.73	62878783.29±13811804.46	1.39046
Malvidin 3-glucoside	492.341	401.2	493.135	[C23H25O12]+	Carbohydrates and carbohydrate conjugates	18470-06-9	605641.86±148622.22	356831.7±31755.85	43711615.3±6214162.38	3182328.27±702153.93	1701039.02±171538.05	1.37065
Deoxymyxol 2-(2,4-di-O-methyl-fucoside)	781.534	391.3	742.517	C48H70O6	Carbohydrates and carbohydrate conjugates		7914202.94±992529.35	13365865.08±955238.56	52457519.94±1307592.11	20608230.45±2321513.64	14849128.57±3335844.69	1.31844
L-Erythrulose	101.025	173	120.042	C4H8O4	Carbohydrates and carbohydrate conjugates	496-55-9	16525243.01±2634585.71	17334679.21±1678300.33	2909110.07±998883.8	35502057.14±8577046.41	47767267.23±4675563.78	1.24126
D-Ribose	131.035	109.5	150.053	C5H10O5	Carbohydrates and carbohydrate conjugates	50-69-1	10452332.98±2192444.77	3838161.55±282879.54	3050266.56±137068.51	37340413.47±8294273.51	3600226.11±613644.51	1.0912
Coniferin	365.104	48.4	342.131	C16H22O8	Carbohydrates and carbohydrate conjugates	531-29-3	26489490.36±6970382.79	1704364.32±275721.95	14870494.98±1137877.02	4482696.97±858710.53	5705830.03±354127.56	1.06045
Vermelone	195.992	327.1	178.063	C10H10O3	Ketones	59796-04-2	21344177.88±407541.25	90518320.59±14425014.76	1679975.11±88130	100184548.66±982104.6	12637157.13±655070.35	2.27182
2-Pentanone	104.107	47.3	86.0732	C5H10O	Ketones	107-87-9	10624436.22±645440.44	10895854.54±674709.24	105317382.57±23131751.49	34372318.87±7307342.94	134976365±35134403.99	2.11713
Valienone	155.035	53.2	174.053	C7H10O5	Ketones		441365.88±97331.78	1277012.53±43432.74	1036530.31±401466.15	3878682.01±488105.34	42390621.49±9453840.86	1.25398
3-Methyl-1-butylamine	110.021	323.2	87.1048	C5H13N	Organic nitrogen compounds	107-85-7	605990825.35±154015411.58	447037156.18±51675377.31	382257027.04±65424104.47	393507264.57±53744170.4	147437020.61±15574971.13	3.38727
Capsiamide	270.315	386.6	269.272	C17H35NO	Organic nitrogen compounds	64317-66-4	128262777.75±11751778.74	104089337.45±23283812.85	135302780.23±23496166.71	132952749.34±37930287.87	84652475±10376916.56	1.28675
Linoleoyl ethanolamide	324.289	425.2	323.282	C20H37NO2	Organic nitrogen compounds	68171-52-8	1094098.04±194710.44	1939171.55±638938.24	28671343.21±2258067.29	4811870.07±306282.01	6937426.51±516391.12	1.04916
Carbamoyl phosphate	141.989	61.2	140.983	CH4NO5P	Organic phosphorus compounds	590-55-6	135876997.35±14909600.72	3274516.25±246068.75	1167650.17±65220.61	7137537.66±1281388.67	82500220.45±23435574.38	2.70807
1-deoxy-L-glycero-tetrulose 4-phosphate	167.013	41.2	184.014	C4H9O6P	Organic phosphorus compounds	114155-98-5	86427426.94±8140675.41	100416486.21±21361904.04	108073623.92±15563606.25	221094911.49±27668190.27	271032036.11±27858389.47	2.547
2,3-Digeranylgeranyl sn-glycerol 1-phosphate	717.528	395.2	716.514	C43H73O6P	Organic phosphorus compounds		29570751.11±7145243.67	59884794.31±25459873.06	98829883.81±27683904.14	69647545.62±3502550.75	26677580.68±8105343.7	1.69875
(S)-alpha-Amino-4-carboxy-3-furanpropanoic acid	199.984	126.8	199.048	C8H9NO5	Organo heterocyclic compounds	54836-90-7	194053827.99±37269816.75	1245886.02±161173.91	273955913.56±81226323	27575001.92±1610978.75	7037101.65±2311230.42	3.71393
Piperine	242.154	251.3	285.136	C17H19NO3	Organo heterocyclic compounds	94-62-2	19103824.5±170468.5	8371944.82±2848904.11	60849478.51±4347290.75	9098302.1±280484.61	235253901.66±26911054.25	2.91779
1,3-dimethylurate	255.077	278.6	196.06	C7H8N4O3	Organo heterocyclic compounds	944-73-0	125343655.19±17774749.67	12964787.49±391007.27	109934906.27±13765510.58	236004957.94±69433253.69	21399412.18±1712638.56	2.9061
Khelloside	409.29	424.7	408.106	C19H20O10	Organo heterocyclic compounds	17226-75-4	232341232.77±33184429.14	81191423.27±8915821.49	17449224.25±2134169.68	13146678.14±338942.89	20452952.43±5313256.18	2.77683
Artemetin	447.13	367.4	388.116	C20H20O8	Organo heterocyclic compounds	479-90-3	88809952.25±14593928.31	10816772.09±1065955.21	178648095.83±11222300.07	21525376.41±3986582.72	41996352.3±4175250.04	2.72337
Imperialin	430.24	254.5	429.324	C27H43NO3	Organo heterocyclic compounds	61825-98-7	63096272.21±2735015.81	67422645.16±22009082.91	5085239.07±139053.94	7948238.38±719571.29	804344.28±38349.79	1.64094
2-Furanmethanol	116.072	417.6	98.0368	C5H6O2	Organo heterocyclic compounds	98-00-0	10019376.1±1263387.39	52693822.79±12768188.82	35626007.43±6085235.71	3252495.86±620763.72	6321434.7±2729164.49	1.62588
Prunetin	283.258	397.4	284.068	C16H12O5	Organo heterocyclic compounds	552-59-0	15617102.96±525110.99	9087782.76±2436783.72	22240020.46±650283.74	80927592.81±25496472.18	1346704.63±205998.22	1.58413
1-Pyrroline	114.056	401.1	69.0578	C4H7N	Organo heterocyclic compounds	5724-81-2	50995726.76±4830376.41	55100113.73±10823985.58	9829406.89±837175.24	53896910.39±8905873.38	5297971.72±723106.55	1.45331
Luteolin	285.039	317.7	286.048	C15H10O6	Organo heterocyclic compounds	491-70-3	30299604±4171272.47	6618948.24±2342203.82	54321956.89±9313039.32	44508504.48±7912680.49	30801930.6±4380680.58	1.4259
NA 28_8;O2	440.406	376.6	439.309	C28H41NO3	Organo heterocyclic compounds	199875-69-9	108160991.13±6576469.99	157468679.98±46257934.42	134052118.52±6237958.91	120368585.42±65537735.3	97730892.32±11304225.03	1.29716
Ginsenoside A2	799.493	388.5	800.492	C42H72O14	Organo heterocyclic compounds	22427-39-0	5153619.96±1088432.48	1007159.27±196453.18	1487412.65±372746.12	1486206.37±458631.27	42086379.08±5334281.09	1.28402
Multifidol	255.089	299.2	210.089	C11H14O4	Organo heterocyclic compounds	125074-06-8	167343.26±6415.89	24737271.93±6147659.4	24198710.17±5298771.76	341555.59±78818.48	613256.93±219761.2	1.24995
Heptadecanoic acid	288.288	323.4	270.256	C17H34O2	Long-chain fatty acids	506-12-7	3897776856.59±228675666.74	3010493987.97±582402160.13	2387618285.09±642075491.59	1531855904.64±186956020.69	1916877461.05±190620794.85	8.38654
FA 18_1;O	316.286	350.2	298.251	C18H34O3	Long-chain fatty acids	2443-39-2	35521983.98±9055492.21	7603975.02±1514483.98	22556058.14±1028960.88	182622004.44±42869973.51	7063389.5±352405.83	2.48968
Behenic acid	358.367	377.3	340.334	C22H44O2	Long-chain fatty acids	112-85-6	23447597.41±4616071.45	36325635.01±2879026.87	61361744.04±1963030.73	1758235.56±293727.41	26807087.49±4179010.49	1.393
FA 20_5;O2	352.32	449.2	334.214	C20H30O4	Long-chain fatty acids	87893-54-7	5321305.54±363278.91	12147414.7±651199.18	43080743.22±1184552.55	25068182.65±5991724.54	9648748.27±2502263.36	1.22749
FA 18_0;O	299.262	405.2	300.266	C18H36O3	Long-chain fatty acids	629-22-1	7977342.64±935508.87	11681210.95±820939.37	27141552.21±5712979.41	43395863.35±4948456.99	50653734.28±503673.33	1.18699
2-oxostearic acid	297.247	380.1	298.251	C18H34O3	Long-chain fatty acids	80559-38-2	15718997.64±1175887.55	26990210.76±8041672.64	39342936.2±4630736.53	56717455.71±20855623.57	59510754.43±10211697.6	1.11671
2-Hydroxyhexadecanoic acid	271.227	354.9	272.235	C16H32O3	Long-chain fatty acids	16452-52-1	24254519.59±3087148.57	6900368.26±470618.72	21705496.81±814919.42	30274472.54±3320225.87	32045712.86±6458794.36	1.07884
Stearic acid	283.269	449.7	284.272	C18H36O2	Long-chain fatty acids	57-11-4	23970132.63±2038920.76	34204194.85±4751105.67	27529538.54±4930712.38	56602306.47±5863133.34	55211464.08±4577747.95	1.07016
18-Hydroxyoleic acid	316.283	326.5	298.251	C18H34O3	Long-chain fatty acids	24753-52-4	48770613.54±20410243.58	49996911.67±13535124.37	56615062.16±6971725.57	52044453.01±19776081.69	20250098.03±2923371.33	1.0156
PC(18_3(9Z,12Z,15Z)_18_3(9Z,12Z,15Z))	778.536	395	777.531	C44H76NO8P	Lipids and lipid-like molecules	2701-19-1	12861283.31±4155859.68	493046286.52±82346413.68	1284137590.18±83064540.6	757780466.89±11715828.79	1582304824.13±411671417.78	6.73948
PC(18_2_18_2)	782.575	394.6	781.562	C44H80NO8P	Lipids and lipid-like molecules	998-06-1	263765301.5±44547201.22	356428026.45±1836501.78	684111675.44±32573203.97	279925635.47±50675407.61	430054651.92±53992137.67	3.8572
PC(16_0_18_1(9Z)-O(12,13))	774.568	394.6	773.557	C42H80NO9P	Lipids and lipid-like molecules		420141859.52±86873357.14	331215247.73±59848774.53	50266724.14±5629785.65	36727419.37±6667827.18	5935982.47±1015436.4	3.77098
PC(16_0_18_3)	756.563	393	755.546	C42H78NO8P	Lipids and lipid-like molecules	182820-31-1	289693102.04±42665866.26	277869668.46±30120688.78	500336874.82±79067976.06	438849673.27±26678766.74	327889616.95±32101038.94	2.98049
Sphinganine	284.293	400.6	301.298	C18H39NO2	Lipids and lipid-like molecules	764-22-7	247872802.71±19131858.52	301715048.99±60115415.6	225384579.95±18241813.67	70130081.43±14262852.76	87910102.67±10043313.93	2.96127
PC(20_1(11Z)_14_1(9Z))	780.554	390.7	757.562	C42H80NO8P	Lipids and lipid-like molecules		1239682.68±196609.3	101375297.74±21290540.79	132144124.91±14895340.19	150147424.76±43963961.89	211170856.45±34295853.1	2.3696
PC(18_3(9Z,12Z,15Z)_18_1(9Z))	782.581	366.4	781.562	C44H80NO8P	Lipids and lipid-like molecules	118139-93-8	10457208.62±895510.74	96559695.19±18802062.89	26316929.45±4036876.8	47105345.21±18033630.93	17988986.89±1254870.95	2.24352
Epi-alpha-amyrin	471.38	402.3	426.386	C30H50O	Lipids and lipid-like molecules	638-95-9	102794883.81±31142701.33	27334331.77±878093.88	88694498.05±6338751.57	71045904.44±399454.71	81512394.22±920310.93	2.02493
PC(P-18_0_P-18_1(9Z))	778.543	421.4	755.619	C44H86NO6P	Lipids and lipid-like molecules		6133155.84±191498.89	15084365.15±3900839.5	104865747.91±6334906.93	21969504.18±1340443.76	18533490.57±8439910.53	1.9848
ST 29_1;O	397.387	409.2	414.386	C29H50O	Lipids and lipid-like molecules	6384-28-7	70646667.84±11190973.47	74421117.52±12012169.79	111066350.57±7093623.77	55600484.49±10998486.88	3410665.44±179287.59	1.91905
(S)-2,3-Epoxysqualene	409.385	405.6	426.386	C30H50O	Lipids and lipid-like molecules	54910-48-4	30661978.42±3979476.59	57635688.01±6031336.05	7780546.22±863157.56	4153144.73±121980.29	585862.89±215243.16	1.58882
Lecithin	802.568	406.8	757.562	C42H80NO8P	Lipids and lipid-like molecules	8002-43-5	35811009.5±1639671.12	26714006.67±1038839.77	30216647.15±3509543.05	90947892.57±4556210.05	80616218.79±15812917.22	1.58008
4-Hydroxysphinganine	318.301	335.9	317.293	C18H39NO3	Lipids and lipid-like molecules	554-62-1	20603456.71±3146456.85	12403447.98±1413781.65	76096962.49±1997976.83	38544155.09±1137911.02	43707231.38±7925089.35	1.54328
PE(16_0_16_0)	673.488	415	691.515	C37H74NO8P	Lipids and lipid-like molecules	5681-36-7	58958919.17±8396075.59	39156719.19±5349105.96	87865920.49±32384935.05	99631819.22±1715804.88	107803776.67±29779423.24	1.48749
Delta14-Steroid	241.179	424.6	258.235	C19H30	Lipids and lipid-like molecules		69258738.97±2278603.38	27188595.06±6403858.17	6941543.12±1201602.3	8149629.12±1982095.3	7074309.15±662532.78	1.48226
PE(18_1(11Z)_16_0)	718.538	396.3	717.531	C39H76NO8P	Lipids and lipid-like molecules		11792407.87±2315263.84	38105452.95±12992716.82	54079137.62±2784778.44	22186290.28±3500723.44	7419845.17±1137724.04	1.44651
Tiglylcarnitine	485.286	350.5	243.147	C12H21NO4	Lipids and lipid-like molecules	64681-36-3	87145403.83±6972551.95	54380430.47±6176678.81	62476766.17±6559508.69	59509818.34±9114896.43	19030227.1±1539972.05	1.42133
Betulinic acid	455.245	413.1	456.36	C30H48O3	Lipids and lipid-like molecules	472-15-1	9863135.28±2180234.21	22494959.98±4505743.83	37403149.12±834407.1	33262753.7±6996330.66	69096314.88±12499597.36	1.26735
alpha-Tocotrienol	423.329	423.1	424.334	C29H44O2	Lipids and lipid-like molecules	1721-51-3	8591.31±1013.52	32296422.74±3261039.36	28403025.38±4889468.97	8251279.47±3930053.44	37304770.82±2974495.89	1.25095
PE(16_0_18_1(9Z))	740.529	392.7	717.531	C39H76NO8P	Lipids and lipid-like molecules	26662-94-2	7801173.29±4650121.23	22788912.07±1088828.73	43732329.65±10109890.67	1278182.45±413317.29	13317497.52±3333529.02	1.23901
PC(P-16_0_24_0)	786.582	363.8	829.692	C48H96NO7P	Lipids and lipid-like molecules		29249223.47±7310126.17	44799186.39±4723847.89	16498777.33±3442255.52	15390243.93±912274.29	11771933.32±1426330.82	1.17412
PC(P-16_0_18_1(9Z))	802.568	369.4	743.583	C42H82NO7P	Lipids and lipid-like molecules	65877-71-6	2047191.09±195783.23	4403484.7±182447.9	19548596.47±1980659.28	36270201.68±5006105.14	28342981.13±2581040.74	1.05884
PE(20_0_14_1(9Z))	718.544	365.3	717.531	C39H76NO8P	Lipids and lipid-like molecules		8876828.93±219012.39	22256183.36±1297218.01	2553467.7±423529.06	15140914.35±3083438.21	2689113.36±217702.9	1.00743

## Sheet: Table S2
Table S2: Identification of key volatile organic compounds in rice-flavored Baijiu aged for different years
Classification	No.	Compounds	CAS	Formula	RI	Lib_RI	rt	Peak Intensity					VIP
								Y0	Y3	Y6	Y9	Y15
Esters(65)	C1	n-butyl acrylate	141-32-2	C7H12O2	1187.85	1184	770.981	197621267±32214650.23	95229155.10741±14518905.8	209076169±22013591.99	256959225±68380689.59	183488877±9741464.97	0.396938
	C2	n-propyl acetate	109-60-4	C5H10O2	989.36	973	457.498	806548103±77026262.37	953147294.000001±156056272.32	642402039±54712315.27	890744237±12508043.09	1805770751±311808736.45	1.12064
	C3	ethyl n-butyrate	105-54-4	C6H12O2	1049.14	1036	550.776	1066497659±54139652.46	1399599802±114110448.81	1380030543±165787566.58	831354286.999999±179775518.91	1017530261±143859202	0.792153
	C4	ethyl-2-methyl butyrate	7452-79-1	C7H14O2	1064.28	1052	574.411	605638045±47478746.11	488518913±14401411.17	405057446±73342012.11	398961062±10121241.78	551344984±18105668.08	0.534727
	C5	ethyl isovalerate	108-64-5	C7H14O2	1079.6	1068	598.341	3660682998±223714103.52	4983320296±456585133.51	2077526174±133433010.64	599052814±107884679.46	849988942±62390388.09	2.10554
	C6	isopentyl lactate	19329-89-6	C8H16O3	1584.8	1580	1326.15	1178240453±283493691.04	674242603±31519907.42	658765486±32304341.72	1441337061±39121683.78	569527177±163326704.08	1.16008
	C7	isoamyl acetate	123-92-2	C7H14O2	1134.8	1123	685.946	3459105427±323006227.67	11203890895±491269161.01	5080523345±619789865.48	8357648185±1185667733	11508525755±658348721.81	3.35392
	C8	ethyl valerate	539-82-2	C7H14O2	1146.64	1134	704.946	156579549±22204187.56	108007491±18842019.22	71324497±13822858.01	90502464±11388049.67	161875964±6581033.14	0.347726
	C9	butanedioic acid, diethyl ester	123-25-1	C8H14O4	1690.64	1681	1455.58	7896165028±1088191358.7	10497864982±673006522.63	8514510837±369076030.98	7854725939±1342346554.15	8891516642.00001±3074766628.76	1.6377
	C10	ethyl caproate	123-66-0	C8H16O2	1245.5	1233	858.867	7104633552±1336234888.37	8064019943±720747787.3	6030316893±245531772.88	4787925461±978941060.01	6287106553±260984717.63	1.68297
	C11	ethyl oenanthate	106-30-9	C9H18O2	1345.48	1331	1005.82	560165727±99230251.64	597307163±51283114.89	257629133±35561497.82	266798822±78370732.53	764553993±78116820.86	0.826053
	C12	Ethyl acetate	141-78-6	C4H8O2	899.42	888	352.163	13598479874±2952922163.04	12395464101±993272774.34	12129995402±456848335.97	11003592171±473565408.98	8969745107±446844886.3	1.96247
	C13	ethyl lactate	687-47-8	C5H10O3	1357.62	1349	1023.18	6398658951±2745318282.13	6029793717±2524867140.93	5015567756±251058185.98	6729412943±412486111.71	5441879352±1097726501.57	1.38781
	C14	ethyl pentadecanoate	41114-00-5	C17H34O2	2154.08	2148	1939	89233741.9999998±15283337.48	116639646±26482820.55	72433673±11208383.12	103154582±15192559.19	98978791±4633945.39	0.211826
	C15	ethyl 2-hydroxy-4-methylvalerate	10348-47-7	C8H16O3	1558.96	1547	1292.82	6160828147±1239440782.02	4592564144±239205494.63	1892019333±241757467.83	6167541218±461152263.36	2609604431±253001260.76	2.74375
	C16	ethyl undecanoate	627-90-7	C13H26O2	1752.1	1739	1527.04	683074068±84413676.32	574100206±57010107.35	316589500±82788050.58	419613311±39844612.68	573599011±43990892.78	0.62536
	C17	dodecanoic acid, ethyl ester	106-33-2	C14H28O2	1855.84	1843	1643.66	18090241393±1487191600.77	15119644900±3039929631.86	14530765696±3750496847.52	15266691773±734168077.82	15310880189±1218480639.22	2.17877
	C18	diethyl azelate	624-17-9	C13H24O4	2206.44		1987.31	18411117±1398300.25	21675186±2253253.92	16267120±2575227.89	19382713±2648003.83	37667092±1623791.18	0.156776
	C19	ethyl phenyllactate	15399-05-0	C11H14O3	2266.32		2042.57	74046025±2542942.43	61318143±8437169.34	37755796±1594057.42	80347877±6880649.47	47104952±3233037.66	0.265792
	C20	isoamyl caprylate	2035-99-6	C13H26O2	1672.12	1658	1433.12	5596750764±1302626557.23	6600893331±1714673884.49	5218411610±460093040.5	2337604960±13144772.68	2435341995±486728759.75	2.00605
	C21	isoamyl isobutyrate	2050-01-3	C9H18O2	1203.88	1192	796.289	275965120±13531781.62	296766680±7161444.07	262713915±52097282.78	213442569±8930861.52	331531305±100662051.55	0.35132
	C22	isobutyl lactate	585-24-0	C7H14O3	1474.83	1455	1183.28	346178129±13726364.88	242269583±60549341.46	228351220±46631793.25	367877279±112009730.58	199191909±48880940.9	0.48587
	C23	ethyl nonanoate	123-29-5	C11H22O2	1548.8	1532	1279.7	5285808821±1199756205.33	4789364984±705709256.54	2403856303±347708012.64	2778791705±88182921.08	5747094098±706355625.49	2.05588
	C24	phenethyl 2-methylbutyrate	24817-51-4	C13H18O2	1992.83	1988	1789.29	25125902±2225335.19	36366418±6896354.9	29456344±2604756.29	20423265±3891435.95	27804216±4541540.94	0.118312
	C25	butanedioic acid, 1-ethyl ester	1070-34-4	C6H10O4	2357.53	2368	2126.76	2037184±176193.76	6129148±447648.23	2297586±389389.97	3891725±1014859.74	5365587±717376.2	0.0752463
	C26	2-methylbutyl isobutyrate	2445-69-4	C9H18O2	1205.7	1199	799.055	135917667±18986910.37	164088037±29333548.18	147935645±24562932.74	159638412±7652584.8	142862086±18054315.3	0.20235
	C27	isobutyl 2-methylbutyrate	2445-67-2	C9H18O2	1186.1	1180	768.206	56634969±10809554.8	68104253±17920794.48	57634342±5364691.46	23623894±6524583.39	57093025±4825886.75	0.224694
	C28	tridecanoic acid, ethyl ester	28267-29-0	C15H30O2	1956.12	1947	1750.91	81052795±1819888.39	69443744±4906594.88	59060791±5401985.93	85211315.9999999±27485653.64	61196632±835551.35	0.199121
	C29	isoamyl 2-methylbutyrate	27625-35-0	C10H20O2	1288.55	1275	923.571	46310641±1971804.83	51038776±16749953.12	45445156±18038916.45	47842651±3101070.43	46147682±3060654.83	0.0335027
	C30	isobutyl caproate	105-79-3	C10H20O2	1364.1	1350	1032.42	188203615±2482771.98	227227684±28989022.61	132691323±31189356.68	68079609±6448582.22	111144271±10629288.38	0.381919
	C31	isobutyl decanoate	30673-38-2	C14H28O2	1765.83	1750	1542.83	1618936278±677516261.88	1399958191±154462544.06	1047856825±90348380.94	694316345±93351246.66	792088555±112797783.21	0.911632
	C32	isoamyl isovalerate	659-70-1	C10H20O2	1305.77	1293	949.04	108513629±6222776.66	169617871±44329738.62	119965493±17754519.36	85066024±10693915.76	65970070±4378714.23	0.315375
	C33	2-methylpropyl isobutyrate	97-85-8	C8H16O2	1100.1	1090	630.363	0	0	0	130696422±61190579.69	225821020±43069141.2	0.481968
	C34	phenethyl hexanoate	6290-37-5	C14H20O2	2179.57	2164	1962.49	127416409±14765067.36	117991774±9503728.07	95069302.9999998±31890022.14	0	0	0.377219
	C35	isobutyl acetate	110-19-0	C6H12O2	1025.85	1012	514.419	4696619417±404471344.51	5753604990±807627895.55	2858573391±258796539.57	5377546324±1785440794.03	0	3.08755
	C36	ethyl caprylate	106-32-1	C10H20O2	1450.17	1435	1150.51	4331324913±60968878.9	3353875463±689313574.23	14621282118±1555028089.49	10254838827±523321728.55	4501298403±467297491.96	3.66603
	C37	ethyl isobutyrate	97-62-1	C6H12O2	980.9	961	444.293	8445129115±640252607.99	9172856096.99999±1057007063.28	8268734494±537331622.48	0	0	3.28344
	C38	2-phenylethyl propionate	122-70-3	C11H14O2	2165.8		1949.35	90685310±22512352.63	57216491±5499395.52	45790255±4122339.44	0	0	0.308221
	C39	isobutyl n-butyrate	539-90-2	C8H16O2	1170.2	1158	742.677	37011843±5862959.51	36987427±2835153.54	44641331±2710787.27	0	0	0.22987
	C40	isoamyl decanoate	2306-91-4	C15H30O2	1873.6	1863	1663.14	2055777429±795391766.3	1789151620±343622971.57	1093029894±221840918.93	617485214±188300711.42	736232768±47906661.57	1.17874
	C41	isoamyl butyrate	106-27-4	C9H18O2	1276.97	1259	906.173	75427154±7963994.86	79623284±13933216.4	95269425±2365587.82	38007290±2741899.97	0±0	0.297798
	C42	2-phenylethyl isobutyrate	103-48-0	C12H16O2	1900.45	1896	1692.62	0	568302307±22565375.12	470900281±42498554.29	0±0	0±0	0.89479
	C43	butyl butyrate	109-21-7	C8H16O2	1230	1220	835.644	23640639±5632225.69	0	0	6946236±642364.73	0±0	0.175082
	C44	isoamyl hexanoate	2198-61-0	C11H22O2	1471	1451	1178.21	266998026±15729582.67	243901489±15118561.23	223991235±3115056.35	232109417±17363357.34	216985315±24067287.4	0.212102
	C45	Pentanoic acid, 2,2,4-trimethyl-3-carboxyisopropyl, isobutyl ester	77-68-9	C16H30O4	1893.14		1684.64	1625043410±226612800.84	2206632708±397013015.27	985283799.000001±376341684.81	2119402614±504124929.57	1698331574±234435187.02	1.38643
	C46	Succinic acid, butyl ethyl ester	67233-92-5	C10H18O4	1806.95	1820	1589.91	549591848±48716590.12	951393987±294462935.9	641977771±100809040.65	444470107±26929864.04	597580258±301868895.4	0.670389
	C47	Oxalic acid, nonyl 2-phenylethyl ester	6290-37-5	C19H28O4	2518.95		2275.7	10717177±1035064.74	7205128±510491.27	0	0	0	0.112688
	C48	3-Methyl-2-butenoic acid, tridec-2-ynyl ester	42078-65-9	C18H30O2	1574.9		1313.35	65842626±29167267.65	92660269.0000002±20945256.05	0	0	0	0.330831
	C49	2-Ethylbutyric acid, phenethyl ester	54897-51-7	C14H20O2	2179.5		1962.44	0	0	0	40473183±5108208.02	41232674±7396341.13	0.226329
	C50	m-Toluic acid, 4-cyanophenyl ester	32792-42-0	C15H11NO2	1382.8		1059.17	0	0	0	0	42947612±6699951.2	0.247338
	C51	Phthalic acid, isobutyl octyl ester	84-78-6	C20H30O4	2463.2		2224.28	0	0	0	0	48225945±11500403.71	0.259399
	C52	ethyl caprate	110-38-3	C12H24O2	1656.38	1639	1414.11	1238202457±174843031.49	11027267944±2614189011.67	12997848171±657332783.53	7678267499±1173931414.34	4192730082±842597785.27	3.87326
	C53	isobutyl octanoate	5461-06-3	C12H24O2	1564.18	1548	1299.54	3107691257±1357596671.8	2876221297±497749441.92	1818382309±343451252.67	951455898.000002±84365028.3	1150991599±164952363.86	1.46258
	C54	ethyl 4-decenoate, (4e)-	76649-16-6	C12H22O2	1680.5	1683	1443.3	2047059555±256773011.88	1819323916±348766870.3	310940407±58826768.36	1010417157±134590810.25	1690957181±767276058.23	1.36791
	C55	propyl caprate	30673-60-0	C13H26O2	1734.98	1724	1507.26	244499314±37338712.22	194590280±15721287.35	224647462±92472200.77	111742721±5916696.61	133608038±8413669.52	0.361796
	C56	ethyl isopentyl succinate	28024-16-0	C11H20O4	1915.94	1901	1708.83	871456159±57487669.29	1945906629±89416150.77	1329291059±266608328.94	664738211±121259131.09	1031784716±219343499.03	1.16932
	C57	ethyl palmitate	628-97-7	C18H36O2	2237.98	2251	2016.41	8450635878±513380857.42	9030403797±590654012.94	8470858666±2041326866.17	9603196557.99999±1707025043.15	9813637909.99998±1647263462.08	1.17856
	C58	ethyl 2-decenoate, (2e)-	7367-88-6	C12H22O2	1775.36		1553.84	157264743±58905070.35	182630782±94945838.52	486167635±19338621.18	296094085±31441833.11	449867143±75257873.3	0.685306
	C59	ethyl (z)-4-decenoate	7367-84-2	C12H22O2	1696.85	1699	1463.11	117887179±23208162.09	186663580±3733147.79	134168483±4093496.74	193896512±14584754.31	371553445±44584378.73	0.515956
	C60	ethyl myristate	124-06-1	C16H32O2	2062	2050	1854.01	13145728905±530993264.39	11259772712±4003130213.29	13489616528±1317943853.9	13886111699±2431397088.66	11285788801±3129647443.69	1.77552
	C61	ethyl crotonate	623-70-1	C6H10O2	1176.6	1160	752.944	16177947±1468744.9	30638079±4859091.22	61515588±21312390.93	58971302±19953380.69	48813637±3536131.7	0.215012
	C62	phenethyl octanoate	5457-70-5	C16H24O2	2338.6	2355	2109.27	31589745±3489608.65	29654742±2317563.49	22881227±3482185.18	16165330±3302990.34	164975341±24710233.55	0.455516
	C63	isopropyl salicylate	607-85-2	C10H12O3	1819.7		1603.89	89364571.9999999±19523136.7	83878176±13349456.01	76599315±3273525.02	74664657±9503420.1	0	0.322896
	C64	ethyl 9-decenoate	67233-91-4	C12H22O2	1703.65	1694	1471.13	367349821±94654114.56	426606560±97513079.4	0	0	0	0.73337
	C65	diethyl fumarate	623-91-6	C8H12O4	1668.8	1654	1429.14	0	0	0	15568270±1591118.06	1304466±193424.75	0.16235
Alkanes(12)	C66	n-decane	124-18-5	C10H22	1000.96	1000	475.581	44572836±6001060.14	64077947±2108640.96	34969598±4353429.12	26316252±2336278.32	57104641±4381348.56	0.21654
	C67	n-hexadecane	544-76-3	C16H34	1602.3	1600	1348.57	1448378148±199859443	922040591±83273283.47	1038236998±122430566.27	1031730437±259645293.45	906092012.999999±145377600.93	0.829571
	C68	n-tridecane	629-50-5	C13H28	1298	1300	937.741	0	0	0	0	97384534±24140808.2	0.371262
	C69	n-tetradecane	629-59-4	C14H30	1399.17	1400	1082.55	1347685086±169935565.05	1568087765±311750915.46	1321423742±142873718.61	455337228±272289160.33	469514964±246600969.48	1.05104
	C70	n-dodecane	112-40-3	C12H26	1195.65	1200	783.5	246123532±47315381.67	447648988±9855541.56	281170092±36363514.5	272984716±37351890.12	219608900±7384151.07	0.5586
	C71	n-pentadecane	629-62-9	C15H32	1503.3	1500	1221.04	0	346374413±112152275.78	0	0	0	0.70233
	C72	n-undecane	1120-21-4	C11H24	1090.3	1100	615.085	58126396±1385094.03	23998816±2598337.78	0	0	0	0.26142
	C73	3-ethyl-3-methylheptane	17302-01-1	C10H22	1088.4		612.046	17433418±2123165.52	0	832222±36222.07	0±0	38279411±3344279.14	0.251152
	C74	undecane, 3-methyl-	1002-43-3	C12H26	1163.8		732.435	25960297±6427315.31	0	28722147±11383877.58	37147570±6335770.8	28458256±3670140.66	0.198789
	C75	n-heneicosane	629-94-7	C21H44	2100.1	2100	1889.13	52168961±7070822.87	0	0	0	0	0.270945
	C76	n-eicosane	112-95-8	C20H42	2000.1	2000	1796.88	114129985±16705405.64	31120080±507231.15	0	0	0	0.370035
	C77	n-heptadecane	629-78-7	C17H36	1700.3	1700	1467.21	205324035±18927879.28	0	0	0	82734869±5122791.82	0.570061
Ketones(12)	C78	2-pentanone, 4-methyl-1,1,1,3,3-d5-	4840-81-7	C6H7D5O	1279.57		910.107	1211735400±445866458.43	1117357806±34439155.35	1238523260±145839837.03	210286608±18093190.78	553329869±46770876.46	1.12541
	C79	3-octanone	106-68-3	C8H16O	1265.82	1253	889.446	124189338±36382403.08	201094512±9026064.77	72836884±11554049.55	53643841±2114632.62	124384718±3747123.34	0.395068
	C80	2-undecanone	112-12-9	C11H22O	1611	1598	1359.08	401122626±67809735.25	406219546±2624247.73	521032789±30261585.73	435244898±176666473.31	573748583±66218709.16	0.487536
	C81	pentadecan-2-one	2345-28-0	C15H30O	2033	2019	1827.24	201604519±88196484.38	262588482±29515646.01	236658536±33801053.41	318669160±18973358.31	310754132±76280210.53	0.332773
	C82	acetoin	513-86-0	C4H8O2	1302.93	1285	944.99	89248426±1082329.72	83091781±5672572.57	107054303±7327080.04	490598451±51468892.31	448698671±46217639.14	0.698984
	C83	2-heptanone	110-43-0	C7H14O	1192.63	1182	778.672	65548121±1996409.17	99818410±3284012.53	96842271.0000001±32358647.55	129305475±20614907.51	148514160±10324863.07	0.264852
	C84	2-tridecanone	593-08-8	C13H26O	1821.3	1809	1605.67	384827285±48959274.01	383045136±24460934.44	297904512±33316979.37	509579718±70009224.58	463046417±35589621.66	0.490489
	C85	3-octen-2-one	1669-44-9	C8H14O	1421.2	1411	1111.94	16487285±2781571.89	10103529±482822.38	12966516±1746786.74	13021424±1435772.39	28761487±4995774.82	0.157771
	C86	4-methyl-2-hexanone	105-42-0	C7H14O	1192.7		778.743	0	0	98242447.9999999±12727009.28	0	0	0.371497
	C87	4-nonanone	4485-09-0	C9H18O	1338.5	1357	995.904	19545144±1840974.31	22189111±343591.96	0	0	0	0.169962
	C88	2-octanone	111-13-7	C8H16O	1296.4	1287	935.449	42213130±3344276.5	29586751±8559746.71	28919607±19367645.57	0	96421758±1032362.66	0.380589
	C89	(z)-oxacyclopentadec-6-en-2-one	63958-52-1	C14H24O2	2103.7		1892.53	2697461±915781.55	2552318±115784.11	44702602±12125024.74	4050768±1603897.55	4834830±786517.23	0.234562
Terpenoids（14）	C90	cadalene	483-78-3	C15H18	2227.82	2233	2007.05	18709643±6071745.08	19143183±7521294.92	21891246±2180860.38	28206350±1566908.46	26686040±4945786.29	0.0875049
	C91	myrcene	123-35-3	C10H16	1169.1	1161	740.939	19242102±7995768.27	21026835±4052856.48	27993147±7894127.59	35616168±6378258.82	33003842±633988.16	0.115711
	C92	gamma-selinene	515-17-3	C15H24	1700.95	1682	1468.05	0	0	0	109111120±4733504.54	141931764±44555542.6	0.392265
	C93	alpha-cedrene	469-61-4	C15H24	1595.9	1577	1340.46	667360133±27183642.21	477553865±51201663.13	770833023±36878959.96	0	0	0.977242
	C94	alpha-thujene	2867-05-2	C10H16	1028.8	1028	519.034	1579688±191653.68	8202407.00000001±2004068.41	6602094±677122.09	1665693±46046.6	2625622±147940.12	0.0928569
	C95	(d)-limonene	5989-27-5	C10H16	1207.4		801.619	104127618±13647763.17	88124068.0000001±18490668.38	76239961±10662535.07	0	0	0.338235
	C96	carene	13466-78-9	C10H16	1156.6	1147	720.824	0	0	29472526±3233980.76	2521165±726256	0	0.197395
	C97	limonene	138-86-3	C10H16	1205.9	1199	799.308	0	0	0	104403486±4221676.4	118815603±6834361	0.373166
	C98	alpha-curcumene	644-30-4	C15H22	1791.64	1777	1572.61	76580892±7018372.93	97776759.0000002±8381354.86	141011170±65362113.46	96958186.0000001±5891505.04	146892538±32470419.09	0.272598
	C99	cis-Muurola-4(15),5-diene	157477-72-0	C15H24	1627.7	1643	1379.29	136941043±41421870.91	156897613±5394447.71	289523643±53131397.43	22954778±1012866.66	125060369±13823474.82	0.565144
	C100	Longifolene-(V4)	61262-67-7	C15H24	1468.1		1174.39	65133630±8477647.01	0	123561828±55166433.38	0	0	0.410991
	C101	o-cymene	527-84-4	C10H14	1283.1	1275	915.387	41538104±4581981.48	0	0	0	0	0.239342
	C102	p-cymene	99-87-6	C10H14	1282.5	1272	914.429	31268774±6139158.56	36845828±3168688.26	37377908±5226502.17	36941798±9687972.4	39662016±432139.27	0.0700817
	C103	p-mentha-1,3,8-triene	18368-95-1	C10H14	1442.9		1140.77	15857142±1142006.05	1393454±542467.42	31587644±3788547.52	43922107±6691362.83	23053152±3908192.9	0.205676
Acetal（5）	C104	2-Ethylhexanal ethylene glycol acetal		C10H20O2	1849.4		1636.55	86751200.0000001±23164030.3	79542641±9975534.66	68443498±20665412.25	0	0	0.31025
	C105	pentane, 1-(1-ethoxyethoxy)-	13442-89-2	C9H20O2	1114.22	1098	653.01	862654709±111959971.28	436043833±24462236.01	430607118±107531885.88	406771114±59770973.13	849447736±38893483.86	0.958897
	C106	propane, 1,1-diethoxy-2-methyl-	1741-41-9	C8H18O2	986.875	973	453.574	292533020±18031604.94	317581679±104131865.03	95863838.0000001±14804995.48	101563012±12431964.95	97602685.0000002±11521623.38	0.520305
	C107	ethoxycyclohexane	932-92-3	C8H16O	1055.5		560.673	47573437±6922808.54	81844111±24993484.27	50257692±3774048.02	43456861±2794456.29	74830290±14046640.91	0.22446
	C108	butane, 1-(1-ethoxyethoxy)-	57006-87-8	C8H18O2	1006.7	1012	484.563	398684221±96770167.41	210021578±60376699.52	205763105±35909380.85	228024155±33075838.53	513754124±157684621.88	0.646515
Acids（4）	C109	acetic acid	64-19-7	C2H4O2	1463.37	1449	1168.08	2418244819±274464163.65	3811719893±321830863.36	1192875817±224757935.42	3852453273±294594969.34	6384896806±519594079.8	2.20748
	C110	octanoic acid	124-07-2	C8H16O2	2072.73	2060	1863.93	2566982951±740838094.01	3920637843±509534015.29	2340570705±376989208.07	1652882429±71840050.83	2363626300±281123281.95	1.48877
	C111	nonanoic acid	112-05-0	C9H18O2	2170.26	2170	1953.91	152761339±55550403.6	114294174±11049526.23	115463398±4887229.67	145966834±1776594.72	151437834±66017865.09	0.170557
	C112	Propionic acid	123-62-6	C6H10O3	1111.6		650.072	11102382±1033616.43	14758645±1595607.13	1594378397±49044919.27	82775929.0000001±25430940.58	87639954.0000002±34153575.94	1.47545
Aldehydes（15）	C113	nonanal	124-19-6	C9H18O	1406.5	1391	1092.4	1199232284±534533164.37	1631305384±111933459.71	1517081299±107619649.35	1524309320±175616159.26	3132979593±103789347.12	1.49571
	C114	2-methylbutyraldehyde	96-17-3	C5H10O	929.2	914	363.526	535503441±237917756.81	508044509±150303513.14	200458628±11252519.52	214884766±25648225.6	160446470±10221478.02	0.631981
	C115	3-methylbutanal	590-86-3	C5H10O	933.3	918	369.971	703245106±47176017.3	682958699±16465663.89	448727138±71228636.36	604672588±34457952.94	723667533±61555802.68	0.53655
	C116	hexaldehyde	66-25-1	C6H12O	1093.18	1083	619.525	460070361±11821185.85	793860967±47087576.47	541333547±25901765.8	488649650±84689327	852361412±125819135.01	0.740726
	C117	lauryl aldehyde	112-54-9	C12H24O	1724.14	1711	1494.75	76247336±3822344.03	58165232±14721814.76	83430253±2488392.46	92754929.0000001±14159039.69	109808403±9634341.57	0.209835
	C118	octylaldehyde	124-13-0	C8H16O	1301.03	1289	942.254	108811647±17721739.78	130474283±6349208.68	96957274.0000001±15811661.33	93780527±5368543.97	285213980±10844405.8	0.506072
	C119	pentanal	110-62-3	C5H10O	991.4	979	460.685	59838854±6842410.66	87974538.0000001±25210344.23	65330146±9074899.32	70769740±13721416.48	140046481±13362902.31	0.291672
	C120	2-methoxyacetaldehyde	10312-83-1	C3H6O2	982.35		446.52	269102087±19185264.09	256588096±66017453.15	291896025±32515309.04	319054521±25527728.64	427148763±52205225.23	0.416282
	C121	tetradecanal	124-25-4	C14H28O	1934.97	1933	1728.75	19977561±3499903.38	22371264±8565760.97	0	22774469±1121107.1	25160728±5277626.22	0.168964
	C122	decaldehyde	112-31-2	C10H20O	1512.5	1498	1232.92	0	0	0	257374542±43052848.87	0	0.683615
	C123	n-heptanal	111-71-7	C7H14O	1195.2	1185	782.836	69130368±5263346.63	88373675±12366231.63	76930218±4576046.92	54811812±12644250.23	113517532±12774221.45	0.280482
	C124	pentadecanal	2765-11-9	C15H30O	2042.4	2041	1835.91	0	0	0	0	13512214±1992376.76	0.13891
	C125	undecanal	112-44-7	C11H22O	1618	1604	1367.6	31441132±1791816.05	34850259±859838.42	38956541±15751510.77	46309559±10577182.09	110670357±8363003.76	0.306146
	C126	furfural	98-01-1	C5H4O2	1480.8	1461	1191.25	262311742±96979330.71	2858919976±23009450.29	2467801433±415982381.1	1785224569±261481507.06	2978235488±599089815.2	1.84662
	C127	2-heptenal, (z)-	57266-86-1	C7H12O	1338.55	1322	995.934	0	0	0	12557014±1995088.26	17452416±3244436.03	0.135528
Aromatic compounds（21）	C128	benzocyclobutene	694-87-1	C8H8	1269.5	1269	894.972	141247403±15489586.52	115196952±8320906.29	76347603±10034644.83	99134781.9999998±32325134.7	94323018.9999999±10510631.34	0.259885
	C129	1,2-diphenylcyclobutane, cis-	7694-30-6	C16H16	2361.55		2130.43	380366901±41247097.6	3016932±346529.69	3882932±198481.87	4488707±1198059.8	0	0.725602
	C130	ethylbenzene	100-41-4	C8H10	1141.28	1129	696.396	0	16158988±4034604.57	3631547±259061.65	4783576±233591.03	17089354±3213128.78	0.153178
	C131	fluorene	86-73-7	C13H10	2319.1	2334	2091.28	15190692±274768.85	18645268±1586026.37	22151202±13203882.41	28622794±4723249.25	25827895±8323186.32	0.0989388
	C132	1,6,7-trimethylnaphthalene	2245-38-7	C13H14	2193.82	2182	1975.67	11937917±763240.92	6187352±1370794.49	8410563±1204522.87	11945427±557916.77	13852205±1372131.06	0.0924032
	C133	benzene, 1,1'-(1,1,2,2-tetramethyl-1,2-ethanediyl)bis-	1889-67-4	C18H22	2332.6		2103.74	531089449±62083229.77	213579113±12872362.07	205585575±12357928.74	170576079±8420649.29	285855932±21414116.9	0.71847
	C134	Butylated Hydroxytoluene	128-37-0	C15H24O	1926.28	1908	1719.67	42293752±3364674.39	318402432±12282396	342378903±69239640.83	384279637±44869828.75	529141880±98276727.95	0.68389
	C135	1,7-dimethylnaphthalene	575-37-1	C12H12	1989.63	2000	1785.98	40093756±2982167.57	45789983±8873761.73	47489524±27560285.14	54016496±4045187.64	45796929±4191824.86	0.123024
	C136	1,1'-biphenyl, 2,2',5,5'-tetramethyl-	3075-84-1	C16H18	2278.23		2053.55	58811928±11199423.05	26654550±13844244.14	15732392±2081109.72	60484026±4791135.74	302829922±38389264.32	0.598091
	C137	4-ethyltoluene	622-96-8	C9H12	1237.1	1226	846.228	17689595±4849633.97	22818103±1619764.82	9589583±1658272.31	13978544±3518237.2	24800714±1137474.6	0.127727
	C138	1-methylindan	767-58-8	C10H12	1414.35	1408	1102.81	3893578±166307.31	5364795±1581656.64	6722606±724497.63	7947834±1549250.64	11039103±439840.57	0.0793906
	C139	1-methylnaphthalene	90-12-0	C11H10	1878.35	1884	1668.35	0	0	0	200770206±14096495.39	207236889±76207764.98	0.495264
	C140	2,3,6-trimethylnaphthalene	829-26-5	C13H14	2136.8		1923.06	5168958±2081662.7	0	0	19893909±5672578.17	19374368±7869097.18	0.150079
	C141	4-xylene	106-42-3	C8H10	1143.75	1139	700.296	41221300±10652328.06	39099781±2614065.21	0	40430925±5593739.41	0	0.299268
	C142	2-xylene	95-47-6	C8H10	1195.1	1187	782.677	0	0	0	45923089±7348177.56	0	0.288584
	C143	amylbenzene	538-68-1	C11H16	1430.6	1420	1124.44	15287677±5184877.76	8714073.99999998±2678537.07	6520218±2659597.45	0	0	0.122672
	C144	1h-indene, 1-methylene-	2471-84-3	C10H8	1766.3	1763	1543.38	996807428.000001±166728575.76	828606272±243638000.4	894312873±78937606.72	982782372.999999±29603092.47	923697512.000001±167044849.13	0.345222
	C145	2-benzyltoluene	713-36-0	C14H14	2137.5	2157	1923.7	47555305±14353075.43	2018189±224879.7	0	5746778±1026803.63	0	0.249175
	C146	toluene	108-88-3	C7H8	1049.9	1042	551.936	50932470±7170741.35	0	0	35942007±3036523.15	0	0.280991
	C147	pentamethylbenzene	700-12-9	C11H16	1666.4	1656	1426.25	73785830±9651633.92	75691344±4154098.83	81346785±3576655.25	79805164±9358810.6	36012300±4393137.96	0.241415
	C148	2,4,2,4-Tetramethyl-biphenyl	4359-47-1	C16H18	2278.3		2053.58	2700859±218785.29	27743610±7329404.27	2515601±690591.8	15191991±1477172.46	18002807±6840367.9	0.197649
Alcohols（22）	C149	n-butyl alcohol	71-36-3	C4H10O	1151.22	1142	712.276	629739273±237344074.66	498936280±8720005.1	1267154047±401195624.81	748816692±126467308.88	493352795±84596450.51	0.941923
	C150	N-Hexyl-D13 Alcohol	204244-84-8	C6HD13O	1344.6		1004.41	77608951±13324064.33	87308232±6487178.68	91561556±10010982.42	81814645±7107571.52	86576853±11041791.51	0.0925516
	C151	n-propanol	71-23-8	C3H8O	1045.44	1036	544.973	2045506358±320688905.58	1758372665±210939007.27	3044613222±546325961.32	2094917693±174058254.81	2451261435±161625389.07	1.2877
	C152	1-nonanol	143-08-8	C9H20O	1664.36	1660	1423.74	610841915±109132845.52	635327176±56555809.79	227331567±16385507.25	479689672±120121206.69	622840943±66556202.45	0.684683
	C153	4-(1,1-dimethylpropyl)phenol	80-46-6	C11H16O	2349.76		2119.57	11833211±759147.09	16506604±4362251.31	14675887±5212241.13	13808509±1908093.7	10821868±2064137.64	0.0680364
	C154	isobutyl alcohol	78-83-1	C4H10O	1102.5	1092	634.185	11312325186±393763392.62	7361045659±1265240792.91	8935279248.99999±1536566359.22	17418180415±1215608929.64	16968191839±540258829.28	3.26985
	C155	2-phenylethanol	60-12-8	C8H10O	1924.05	1907	1717.33	19647893934±1195083641.56	18498753117±3107152912.22	17690524982±3604447730.72	14390275826±2188480043.89	14280053220±1665884653.74	2.30352
	C156	isoamyl alcohol	123-51-3	C5H12O	1214.97	1209	813.021	23815599897±4269904546.75	22947721033±5410927328.73	21512461253±2624326284.77	21713437553±7691485150.59	19695817022±1735017152.87	2.53703
	C157	nerolidol	7212-44-4	C15H26O	2046.7	2034	1839.88	38255655±7339380.38	43968987±18045602.84	45398723±3302104.08	53613242±7613052.33	69930393±14870674.25	0.162492
	C158	1-octen-3-ol	3391-86-4	C8H16O	1455.23	1450	1157.23	718102658±127795714.16	802899655±342059481	309188248±51141767.53	386680070±50374301.11	459676746±62875668.95	0.735951
	C159	2-pentanol	6032-29-7	C5H12O	1127.53	1119	674.291	19685514±1154914.25	25347697±4555595.5	21689783±9943137.56	19687263±909103.23	14310630±2904072.76	0.0967878
	C160	sec-butyl alcohol	78-92-2	C4H10O	1031.4	1025	523.143	93979189.0000001±13139257.53	109543615±14010764.81	135689087±18295541.29	113598721±22106338.82	158051245±29012269.42	0.269721
	C161	alpha-terpineol	98-55-5	C10H18O	1707.85	1697	1475.96	44460526±3335899.9	30535208±7635316.23	60748071±9022703.4	96675221.9999999±30794955.53	109470732±50454122.49	0.246979
	C162	2-ethyl-1-hexanol	104-76-7	C8H18O	1494.85	1491	1209.89	0	0	0	57586820±3668922.1	0	0.323159
	C163	2-heptanol	543-49-7	C7H16O	1322.33	1320	972.737	43903713±2573514.62	39807679±3134966.08	32162724±5377619.75	0	0	0.221387
	C164	2-nonanol	628-99-9	C9H20O	1522.4	1521	1245.68	212999086±33602833.88	212254826±10102220.53	235811813±8982269.55	403442760±15654556.65	339233226±22827214.05	0.466733
	C165	1-dodecanol	112-53-8	C12H26O	1969	1969	1764.35	0	20625620±11408032.96	42387086±5063860.39	53184871±6008316.91	57619732±19179469.47	0.232503
	C166	2-undecanol	1653-30-1	C11H24O	1721.17	1718	1491.33	186173863±34839909.57	168697611±39066201.92	179247505±24422245.18	295326514±121400632.9	305899474±55407630.04	0.352112
	C167	bicyclo[4.2.0]octa-1,3,5-trien-7-ol	35447-99-5	C8H8O	1646		1401.46	0	0	0	12808533±3362584.39	15125069±2310671.78	0.131869
	C168	3-octanol	589-98-0	C8H18O	1396.07	1393	1078.11	149162307±6418573.93	185633683±8130391.04	46947494±6760521.77	0	0	0.453664
	C169	delta-cadinol	19435-97-3	C15H26O	2191.6	2187	1973.64	11156856±1522089.74	0	0	0	0	0.124125
	C170	1,5-hexadien-3-ol	924-41-4	C6H10O	1100.7		631.25	0	0	0	0	16249443±2183724.94	0.151671
Others(10)	C171	2-amylfuran	3777-69-3	C9H14O	1242.44	1232	854.296	648366482±192795441.12	1098455946±195485997.11	659203457±226249946.23	625545440±178210888.75	1123863591±26583432.45	0.847141
	C172	benzothiazole	95-16-9	C7H5NS	1977.7	1958	1773.45	4047949±583830.05	6154015±853419.37	9933068±2550654.31	27505622±9193864.62	14093178±2500322.69	0.165894
	C173	2-butylfuran	4466-24-4	C8H12O	1141.5	1123	696.702	0	0	0	20804840±1912109.91	38013485±1394190.71	0.198556
	C174	Tetrahydropyran Z-10-dodecenoate		C17H30O3	1698.3		1464.82	0	0	0	63212108±8702256.5	0	0.334616
	C175	xanthene	92-83-1	C13H10O	2324.4		2096.18	2434861±318777.06	1988775±57780.72	2032034±106800.65	3950350±437915.73	3715992±540160.68	0.045873
	C176	2,4-dimethyl-2-decene	74421-03-7	C12H24	1367.1		1036.76	227691652±23035870.48	515330496±40976628.6	0	0	0	0.798222
	C177	3-methyl-1-hexene	3404-61-3	C7H14	1322.9		973.513	0	0	0	0	12985500±755525.13	0.136377
	C178	vinylisopentyl ether	39782-38-2	C7H14O	925.06		357.108	85319490±6226811.5	65000435±16520165.54	42854944±4013335.62	64006806±26994349.42	111677085±5589648.11	0.269807
	C179	Furfuryl ethyl ether	6270-56-0	C7H10O2	1299.02		939.309	353016313±67394936.49	750063718±78216919.49	262605831±43596196.73	248439866±41362204.67	195236313±2190227.28	0.832933
	C180	4-ethylphenol	123-07-9	C8H10O	2172.1	2187	1955.63	32998021±2658451.75	30956723±2269584.12	29133166±768413.62	23508206±7122037.7	21598952±2881473	0.101113
